# Supplementary material
Source: HighWire-hosted journal article supplement (https://bmjopen.bmj.com/content/10/8/e038625)
Supplement: inline-supplementary-material-2 [file inline-supplementary-material-2.pdf]

## Supplementary file 2: Focus group characteristics

| School     | Age of pupils in focus groups (years)                     |                                                             | Length of focus groups with KS1 (mins) | Length of focus groups with KS2 (mins) |
|------------|-----------------------------------------------------------|-------------------------------------------------------------|----------------------------------------|----------------------------------------|
|            | KS1                                                       | KS2                                                         |                                        |                                        |
| Priory     | 6-7 years*<br>(N=10)                                      | 8-10 years*<br>(N=10)                                       | 35                                     | 48                                     |
| Victoria   | 6-7 years*<br>(N=9)                                       | 8-10 years*<br>(N=10)                                       | 53                                     | 54                                     |
| Park       | 2 x 7 yrs<br>2 x 5 yrs<br>(N=10)                          | 1 x 7 yrs<br>4 x 8 yrs<br>2 x 9 yrs<br>3 x 10 yrs<br>(N=10) | 33                                     | 41                                     |
| Manor      | 5-7 years*<br>(N=9)                                       | 8-11 years*<br>(N=10)                                       | 50                                     | 27                                     |
| Enterprise | 1 x 5 yrs<br>5 x 6 yrs<br>1 x 7 yrs<br>1 x 8 yrs<br>(N=8) | 4 x 8 yrs<br>2 x 9 yrs<br>2 x 10 yrs<br>(N=8)               | 25                                     | 47                                     |
| City       | 5 x 6 yrs<br>3 x 6 yrs (N=9)                              | 8 x 8 yrs<br>2 x 9 yrs<br>(N=10)                            | 35                                     | 29                                     |
| New        | 4 x 6 yrs<br>6 x 7 yrs<br>(N=10)                          | 6 x 8 yrs<br>4 x 9 yrs<br>(N=10)                            | 28                                     | 34                                     |
